# Supplementary material for: Intracellular mechanism by which arsenite activates the yeast stress MAPK Hog1
Source: PubMed Central journal article supplement — Mol Biol Cell. 2018 Aug 1;29(15):1904–15. doi: 10.1091/mbc.E18-03-0185 (PMC6085820; doi:10.1091/mbc.e18-03-0185), 2018-08-01
Supplement: mbc-29-1904-s001.pdf [file mbc-29-1904-s001.pdf]

# Supplemental Materials

*Molecular Biology of the Cell*

Leea and Levin

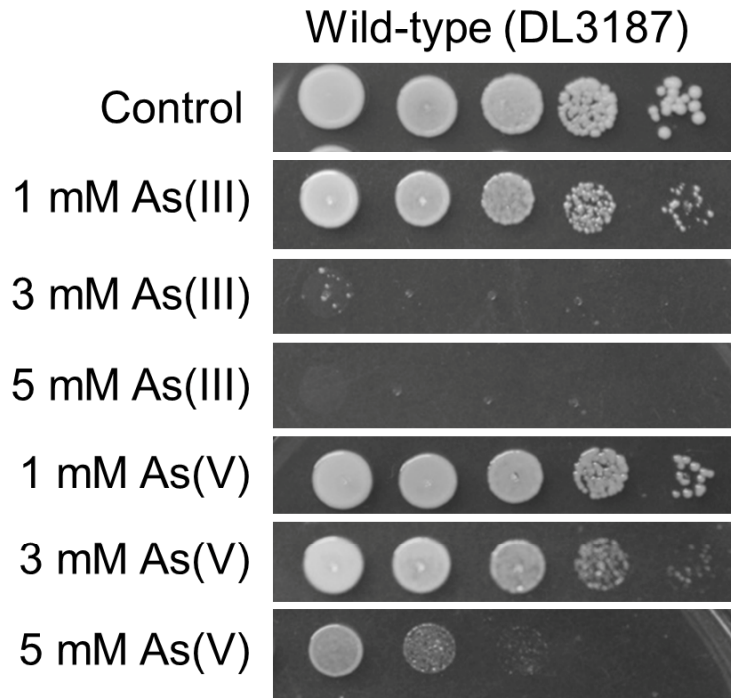

**Supplemental Figure S1.** Growth inhibition spot plate assays for As(III) and As(V). Wild-type (DL3187) cells were spotted at serial 10-fold dilutions (left to right) onto YPD plates containing the indicated concentration of As(III) or As(V) and incubated at 30°C for 2 days.
